# Supplementary material for: Corrosion behaviour of eco-friendly airbrushed reduced graphene oxide-poly(vinyl alcohol) coatings
Source: Royal Society of Chemistry journal article supplement (doi:10.1039/c7gc02882b), 2017-12-20
Supplement: c7gc02882b2.pdf [file c7gc02882b2.pdf]

# Supporting Information for

## Corrosion Behavior of Eco-Friendly Airbrushed Reduced Graphene Oxide-Poly(vinyl alcohol) Coatings

*Souvik De,<sup>a</sup> Jodie L. Lutkenhaus<sup>a,b\*</sup>*

<sup>a</sup> Artie McFerrin Department of Chemical Engineering Texas A&M University, College Station,  
TX 77843, USA

<sup>b</sup> Department of Materials Science & Engineering, Texas A&M University, College Station, TX  
77843, USA

Table S1. Amount of PVA added into GO for different composition of PVA/GO composite.

| Composition  | Volume of 2 mg/mL GO (mL) | Weight of 1 wt% PVA solution (g) |
|--------------|---------------------------|----------------------------------|
| 20:80 PVA/GO | 50                        | 2.5                              |
| 30:70 PVA/GO | 50                        | 4.28                             |
| 40:60 PVA/GO | 50                        | 6.67                             |
| 50:50 PVA/GO | 50                        | 10                               |

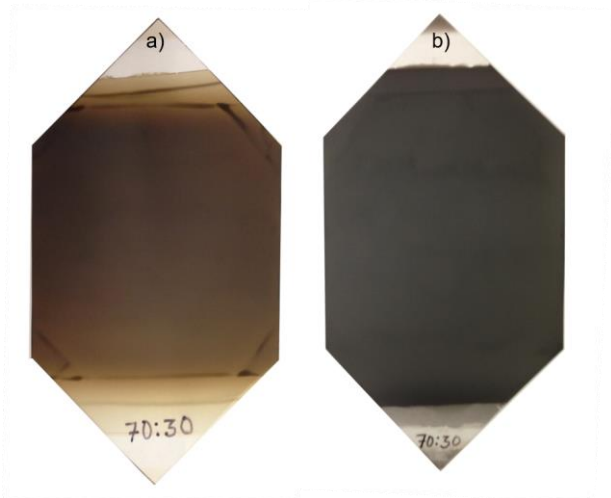

Figure S1. PVA/GO composite coating on PET substrate a) before reduction and b) after reduction.

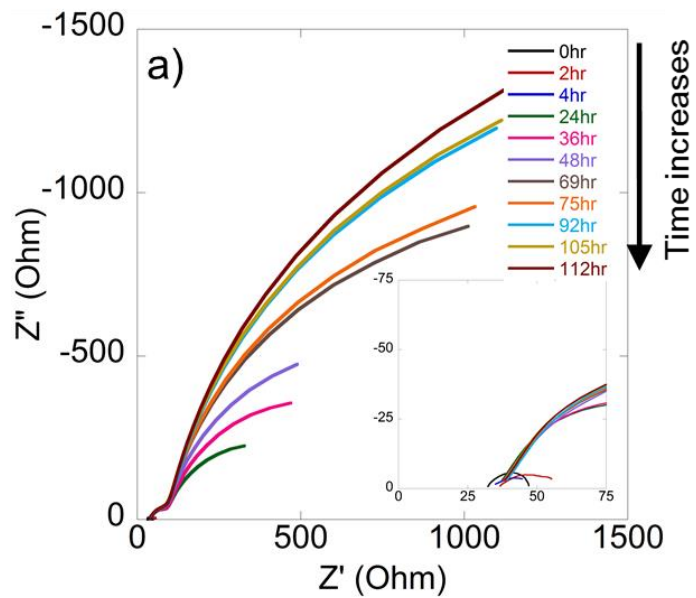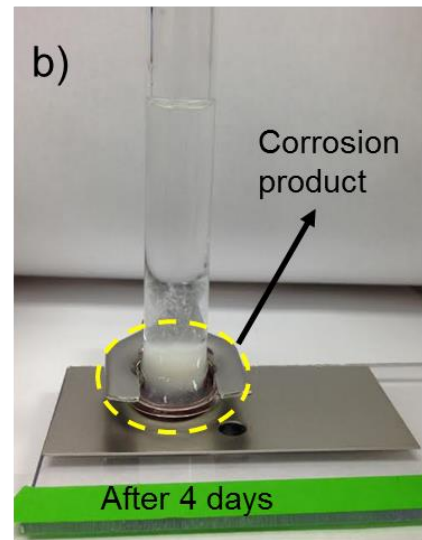

Figure S2. a) Temporal evolution of the Nyquist plot for bare aluminum alloy in 0.2 M NaCl. b) Rapid corrosion of bare aluminum alloy resulted in thick deposition of corrosion products during the EIS study in the paint-cell configuration.

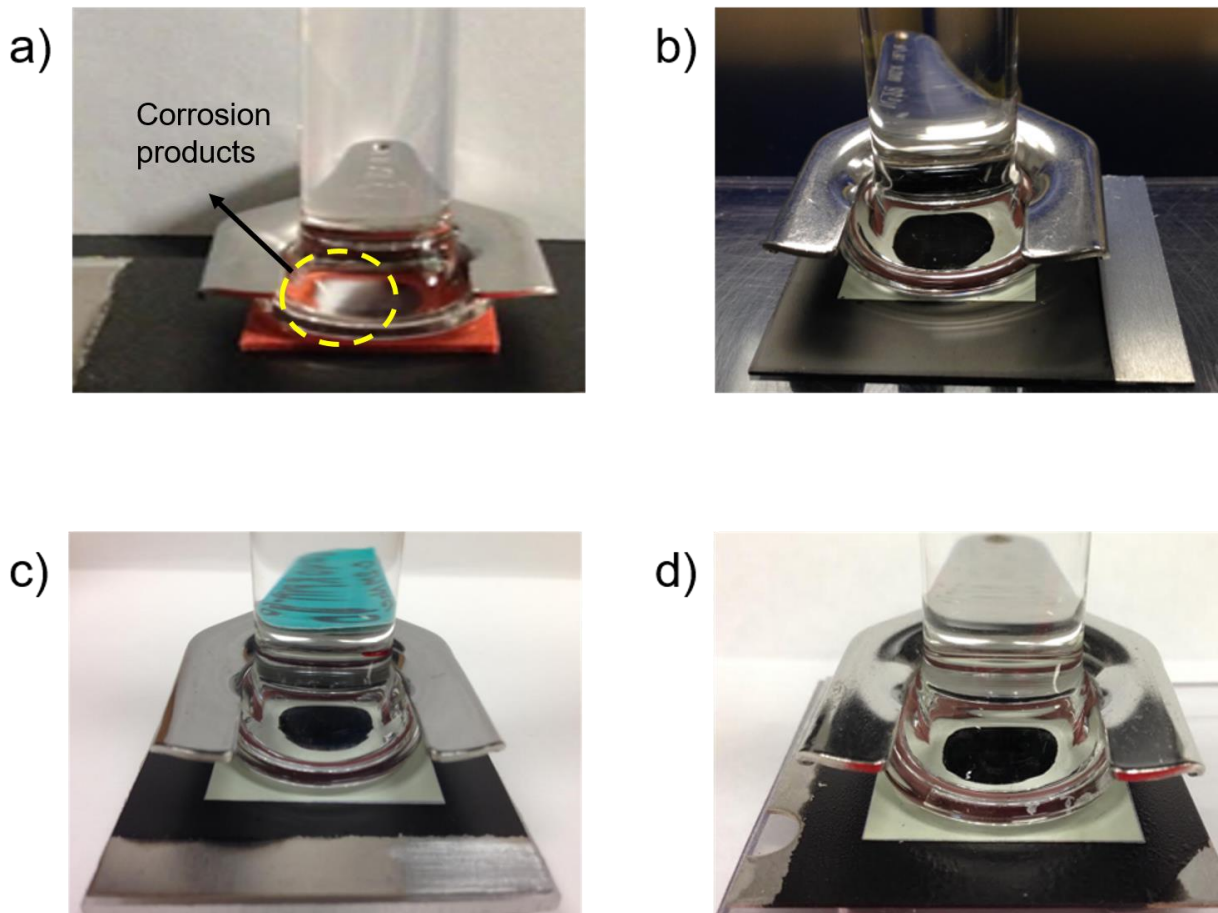

Figure S3. Digital images of a) 20:80 R-PVA/GO, b) 30:70 R-PVA/GO, c) 40:60 R-PVA/GO, d) 50:50 R-PVA/GO coated aluminum alloy at 20 days of electrochemical testing in paint cells. For 20:80 R-PVA/GO coated aluminum alloy, we observed slight corrosion products, whereas for other compositions, we did not observe any accumulated corrosion products after 30 days.
